# Supplementary material
Source: Springer Nature journal article supplement (https://www.springermedizin.de/resource/supplementary/12974_2011_441_MOESM1_ESM.pdf/9601278)

**Control**

**TNF $\alpha$  + IL-1 $\beta$  + IFN $\gamma$**

**LPS + IFN $\gamma$**

**BV-2**

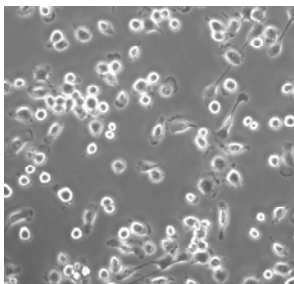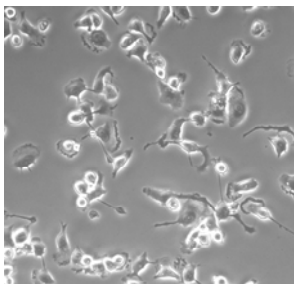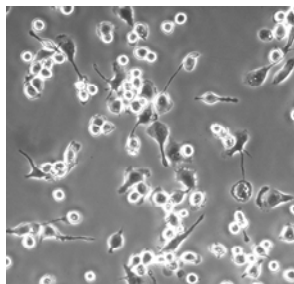

**HAPI**

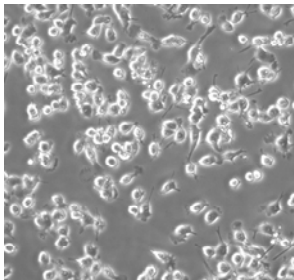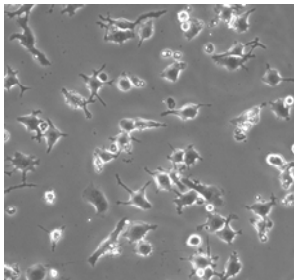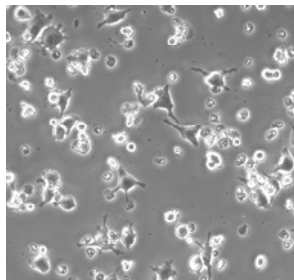

**Mouse  
primary  
microglia**

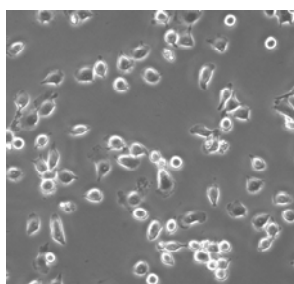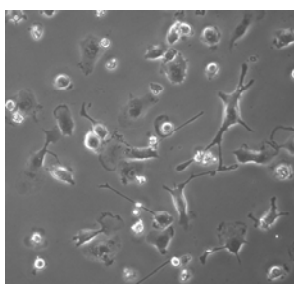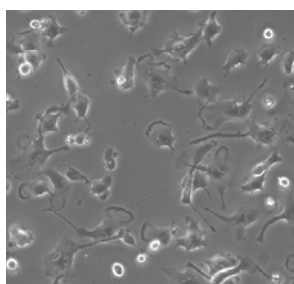

**Rat  
Primary  
microglia**

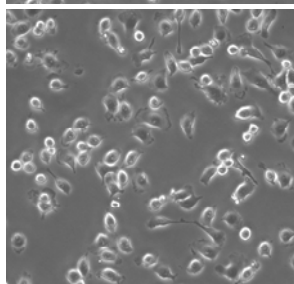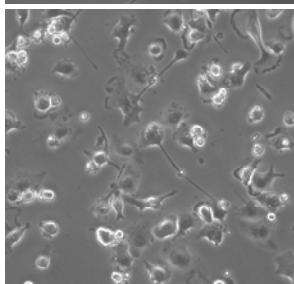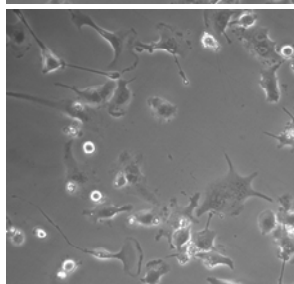

**DITNC**

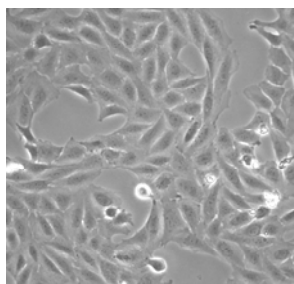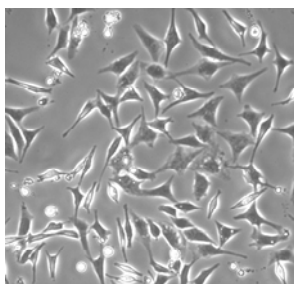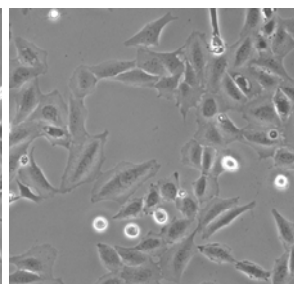

**Rat primary  
astrocytes**

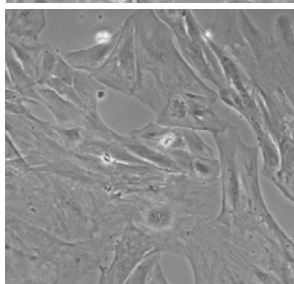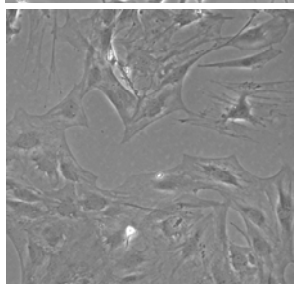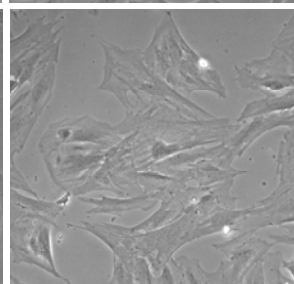

Supplement: MOESM1 [file 9601278]
